# Supplementary material
Source: ML conference proceedings conference paper supplement (https://proceedings.mlr.press/v37/sibony15.html)
Supplement: Supplementary file [file sibony15-supp.pdf]

---

# Supplementary Material for the paper ‘‘MRA-based Statistical Learning from Incomplete Rankings’’

---

Eric Sibony  
Stéphan Cl  men  on  
J  r  mie Jakubowicz

ERIC.SIBONY@TELECOM-PARISTECH.FR  
STEPHAN.CLEMENCON@TELECOM-PARISTECH.FR  
JEREMIE.JAKUBOWICZ@TELECOM-SUDPARIS.E

## 1. Illustrative example of the statistical and computational challenge

We begin with an example to illustrate the complexity of the combinatorial relationships that exist between the marginals of a ranking model, and how it leads to a statistical and computational challenge. Let  $n = 4$  and  $\mathcal{A} = \{\{1, 3\}, \{2, 4\}, \{3, 4\}, \{1, 2, 3\}, \{1, 3, 4\}\}$ . Assuming the  $P_A$ 's are known, finding a function  $q \in L(\mathfrak{S}_4)$  such that  $M_A q = P_A$  for all  $A \in \mathcal{A}$  boils down to solving the linear system given in Figure 1. The values of  $q$  are denoted by  $q_\sigma$  instead of  $q(\sigma)$  for  $\sigma \in \mathfrak{S}_4$ . This system shows that all the equations are quite entangled. For instance, the unknown  $q_{1234}$  appears in 5 equations. Hence, not only the dimension of the system quickly explodes with  $n$ , but all the equations have complex relationships, and decomposing this system into simpler ones is far from being obvious.

In a statistical setting, a natural approach would certainly be to perform a least-square regression with the unknowns as parameters. The complex relationships between the marginals would however remain, and the computation of the gradient would quickly become intractable as  $n$  grows.

## 2. General definitions and results

Here we introduce some general definitions and results that are useful for the technical proofs in the sequel. We denote by  $\mathbb{I}\{\mathcal{E}\}$  the indicator function of any event  $\mathcal{E}$  so that  $\mathbb{I}\{\mathcal{E}\} = 1$  if  $\mathcal{E}$  is true and 0 if it is false.

**Definition 1** (Induced ranking). Let  $\pi \in \Gamma_n$  be an incomplete ranking and  $A \in \mathcal{P}(c(\pi))$  be a subset of items in the content of  $\pi$ . The ranking induced by  $\pi$  over  $A$  is by definition the unique subword of  $\pi$  of content  $A$ . We denote it by  $\pi|_A$ .

**Definition 2.** For a ranking  $\pi = \pi_1 \dots \pi_k \in \Gamma_n$  and for  $1 \leq i < j \leq k$ , we denote by  $\pi_{[i,j]}$  its subword defined by  $\pi_{[i,j]} = \pi_i \dots \pi_j$ .

**Definition 3.** Define the coefficients  $\alpha_B(\pi, \pi') := X_B \delta_\pi(\pi')$  for  $B \in \mathcal{P}(\llbracket n \rrbracket)$  and  $\pi, \pi' \in \Gamma(B)$ , so that for

$F \in L(\Gamma(A))$  with  $A \in \mathcal{P}(\llbracket n \rrbracket)$  and  $\pi \in \Gamma(B)$ :

$$X_B F(\pi) = \sum_{\pi' \in \Gamma(B)} \alpha_B(\pi, \pi') M_B F(\pi').$$

**Lemma 1.** Let  $A \in \mathcal{P}(\llbracket n \rrbracket)$  with  $|A| = k$  and  $(F_B)_{B \in \mathcal{P}(A)} \in \bigoplus_{B \in \mathcal{P}(A)} H_B$ . Then for all  $\pi \in \Gamma(A)$ ,

$$\sum_{B \in \mathcal{P}(A)} \phi_A F_B(\pi) = \sum_{1 \leq i < j \leq k} \frac{F_{c(\pi_{[i,j]})}(\pi_{[i,j]})}{(k - j + i)!}.$$

*Proof.* By definition of the embedding operator,

$$\begin{aligned} \phi_A F_B(\pi) &= \sum_{\pi' \in \Gamma(B)} F_B(\pi') \frac{\mathbb{I}\{\pi' \sqsubset \pi\}}{(k - |\pi'| + 1)!} \\ &= F_B(\pi|_B) \frac{\mathbb{I}\{\pi|_B \sqsubset \pi\}}{(k - |B| + 1)!}. \end{aligned}$$

Thus only the terms  $\phi_A F_B(\pi)$  where  $B$  is such that  $\pi|_B$  is a contiguous subword of  $\pi$  are potentially not null in the sum  $\sum_{B \in \mathcal{P}(A)} \phi_A F_B(\pi)$ . As the contiguous subwords of  $\pi$  are all of the form  $\pi_{[i,j]}$  with  $1 \leq i < j \leq k$ , this concludes the proof.  $\square$

## 3. Technical proofs of Section 4

For a random variable  $\mathbf{X}$  in  $\mathbb{R}^d$  with  $d \geq 1$  and a sigma-algebra  $\mathcal{B}$ , we denote by  $\mathbb{E}[\mathbf{X}|\mathcal{B}]$  the conditional expectation of  $\mathbf{X}$  given  $\mathcal{B}$ , and define  $\text{Var}[\mathbf{X}|\mathcal{B}] := \mathbb{E}[(\mathbf{X} - \mathbb{E}[\mathbf{X}])^2|\mathcal{B}]$ .

*Proof of Proposition 1.* Since  $\sum_{\sigma \in \mathfrak{S}_n} \hat{q}_N(\sigma) = 1$ , one has for any  $A \in \mathcal{P}(\llbracket n \rrbracket)$

$$\begin{aligned} \|M_A \hat{q}_N - P_A\|_A^2 &= \left\| \sum_{B \in \mathcal{P}(A)} \phi_A (X_B \hat{q}_N - X_B p) \right\|_A^2 \\ &\leq 2^{|A|} \sum_{B \in \mathcal{P}(A)} \|\phi_A (X_B \hat{q}_N - X_B p)\|_A^2, \end{aligned}$$

using Theorem 3 and the Cauchy-Schwarz inequality. For  $A, B \in \mathcal{P}(\llbracket n \rrbracket)$  with  $A \subset B$ ,  $F \in L(\Gamma(B))$  and  $\pi \in$

$$\left\{ \begin{array}{l}
 q_{1234} + q_{1243} + q_{1324} + q_{1342} + q_{1423} + q_{1432} + q_{2134} + q_{2143} + q_{2413} + q_{4123} + q_{4132} + q_{4213} = P_{\{1,3\}} \quad (13) \\
 q_{2314} + q_{2341} + q_{2431} + q_{3124} + q_{3142} + q_{3214} + q_{3241} + q_{3412} + q_{3421} + q_{4231} + q_{4312} + q_{4321} = P_{\{1,3\}} \quad (31) \\
 q_{1234} + q_{1243} + q_{1324} + q_{2134} + q_{2143} + q_{2314} + q_{2341} + q_{2413} + q_{2431} + q_{3124} + q_{3212} + q_{3241} = P_{\{2,4\}} \quad (24) \\
 q_{1342} + q_{1423} + q_{1423} + q_{3142} + q_{3412} + q_{3421} + q_{4123} + q_{4132} + q_{4213} + q_{4231} + q_{4312} + q_{4321} = P_{\{2,4\}} \quad (42) \\
 q_{1234} + q_{1324} + q_{1342} + q_{2134} + q_{2314} + q_{2341} + q_{3124} + q_{3142} + q_{3214} + q_{3241} + q_{3412} + q_{3421} = P_{\{3,4\}} \quad (34) \\
 q_{1243} + q_{1423} + q_{1432} + q_{2143} + q_{2413} + q_{2431} + q_{4123} + q_{4132} + q_{4213} + q_{4231} + q_{4312} + q_{4321} = P_{\{3,4\}} \quad (43) \\
 \\
 q_{1234} + q_{1243} + q_{1423} + q_{4123} = P_{\{1,2,3\}} \quad (123) \\
 q_{1324} + q_{1342} + q_{1432} + q_{4132} = P_{\{1,2,3\}} \quad (132) \\
 q_{2134} + q_{2143} + q_{2413} + q_{4213} = P_{\{1,2,3\}} \quad (213) \\
 q_{2314} + q_{2341} + q_{2431} + q_{4231} = P_{\{1,2,3\}} \quad (231) \\
 q_{3124} + q_{3142} + q_{3412} + q_{4312} = P_{\{1,2,3\}} \quad (312) \\
 q_{3214} + q_{3241} + q_{3421} + q_{4321} = P_{\{1,2,3\}} \quad (321) \\
 q_{1234} + q_{1324} + q_{1342} + q_{2134} = P_{\{1,3,4\}} \quad (134) \\
 q_{1243} + q_{1423} + q_{1432} + q_{2143} = P_{\{1,3,4\}} \quad (143) \\
 q_{2314} + q_{3124} + q_{3142} + q_{3214} = P_{\{1,3,4\}} \quad (314) \\
 q_{2341} + q_{3241} + q_{3412} + q_{3421} = P_{\{1,3,4\}} \quad (341) \\
 q_{2413} + q_{4123} + q_{4132} + q_{4213} = P_{\{1,3,4\}} \quad (413) \\
 q_{2431} + q_{4231} + q_{4312} + q_{4321} = P_{\{1,3,4\}} \quad (431)
 \end{array} \right.$$

Figure 1. Linear system to find a function  $q$  on  $\mathfrak{S}_4$  with the same marginals as  $p$  for  $A \in \{\{1, 3\}, \{2, 4\}, \{3, 4\}, \{1, 2, 3\}, \{1, 3, 4\}\}$

$\Gamma(A)$ , one has by definition of the embedding operator,  $\phi_A F(\pi) = F(\pi|_B) \mathbb{I}\{\pi|_B \sqsubset \pi\} / (|A| - |B| + 1)!$  and thus

$$\begin{aligned}
 \|\phi_A F\|_A^2 &= \sum_{\pi \in \Gamma(A)} \frac{F(\pi|_B)^2}{(|A| - |B| + 1)!^2} \mathbb{I}\{\pi|_B \sqsubset \pi\} \\
 &= \sum_{\pi' \in \Gamma(B)} \frac{F(\pi')^2}{(|A| - |B| + 1)!^2} \sum_{\substack{\pi \in \Gamma(A) \\ \pi|_B = \pi'}} \mathbb{I}\{\pi|_B \sqsubset \pi\}.
 \end{aligned}$$

Now, for  $\pi \in \Gamma(A)$  and  $\pi' \in \Gamma(B)$ ,  $\pi' = \pi|_B$  and  $\pi|_B \sqsubset \pi$  is equivalent to  $\pi' \sqsubset \pi$ , so  $\sum_{\pi \in \Gamma(A), \pi|_B = \pi'} \mathbb{I}\{\pi|_B \sqsubset \pi\} = |\{\pi \in \Gamma(A) \mid \pi' \sqsubset \pi\}|$ . It is easy to see that this last value is equal to the number of permutations on the set  $(c(\pi) \setminus c(\pi')) \cup \{\diamond\}$  where  $\diamond$  is an element that represents the block  $\pi'$ . It is thus equal to  $(|A| - |B| + 1)!$ , and therefore  $\|\phi_A X\|_A^2 = \|F\|_B^2 / (|A| - |B| + 1)!$ . Injecting this result, one obtains

$$\mathcal{E}(\hat{q}_N) \leq \sum_{A \in \mathcal{A}} \nu(A) \sum_{B \in \mathcal{P}(A)} \frac{2^{|A|}}{(|A| - |B| + 1)!} \mathbb{E} \left[ \|\hat{X}_B - X_B p\|_B^2 \right].$$

Inverting the sums concludes the proof.  $\square$

The proof of Proposition 2 relies on the following result.

**Lemma 2.** Let  $B \in \mathcal{P}(A)$  and  $\hat{\theta} \in \mathcal{F}(\mathcal{B}_N^\nu, \mathbb{R}^{2^n})$ . For  $\pi \in \Gamma(B)$ ,

$$\mathbb{E} \left[ \hat{X}_{B, \hat{\theta}}(\pi) \right] = X_B p(\pi) \mathbb{E} \left[ \sum_{A \in \hat{\mathcal{A}}_N \cap \mathcal{Q}(B)} \hat{\theta}(A) \right].$$

*Proof.* For  $\pi \in \Gamma(B)$ , one has

$$\mathbb{E} \left[ \hat{X}_{B, \hat{\theta}}(\pi) \right] = \mathbb{E} \left[ \mathbb{E} \left[ \sum_{A \in \hat{\mathcal{A}}_N \cap \mathcal{Q}(B)} \hat{\theta}(A) X_B \hat{P}_A(\pi) \mid \mathcal{B}_N^\nu \right] \right].$$

Since  $\hat{\mathcal{A}}_N$  is  $\mathcal{B}_N^\nu$ -measurable by construction and  $\hat{\theta} \in \mathcal{F}(\mathcal{B}_N^\nu, \mathbb{R}^{2^n})$  by hypothesis,

$$\begin{aligned}
 \mathbb{E} \left[ \sum_{A \in \hat{\mathcal{A}}_N \cap \mathcal{Q}(B)} \hat{\theta}(A) X_B \hat{P}_A(\pi) \mid \mathcal{B}_N^\nu \right] &= \\
 \sum_{A \in \hat{\mathcal{A}}_N \cap \mathcal{Q}(B)} \hat{\theta}(A) \mathbb{E} \left[ X_B \hat{P}_A(\pi) \mid \mathcal{B}_N^\nu \right]. &
 \end{aligned}$$

Then for  $A \in \widehat{\mathcal{A}}_N \cap \mathcal{Q}(B)$ ,

$$\begin{aligned} & \mathbb{E} \left[ X_B \widehat{P}_A(\pi) \mid \mathcal{B}_N^\nu \right] \\ &= \mathbb{E} \left[ \sum_{\pi' \in \Gamma(B)} \alpha_B(\pi, \pi') M_B \widehat{P}_A(\pi') \mid \mathcal{B}_N^\nu \right] \\ &= \sum_{\pi' \in \Gamma(B)} \alpha_B(\pi, \pi') \sum_{\sigma \in \Gamma(A), \pi' \subset \sigma} \mathbb{E} \left[ \widehat{P}_A(\sigma) \mid \mathcal{B}_N^\nu \right], \end{aligned}$$

where the  $\alpha_B(\pi, \pi')$  coefficients are defined in Definition 3. Now, for  $\sigma \in \Gamma(A)$ ,  $\widehat{P}_A(\sigma) = (\sum_{i \in \widehat{I}_A} \mathbb{I}\{\pi^{(i)} = \sigma\}) / |\widehat{I}_A|$  so  $|\widehat{I}_A| \widehat{P}_A(\sigma) \mid \mathcal{B}_N^\nu$  is a binomial random variable of parameters  $(|\widehat{I}_A|, P_A(\sigma))$ , and thus  $\mathbb{E} \left[ \widehat{P}_A(\sigma) \mid \mathcal{B}_N^\nu \right] = P_A(\sigma)$ . Therefore

$$\begin{aligned} & \mathbb{E} \left[ X_B \widehat{P}_A(\pi) \mid \mathcal{B}_N^\nu \right] = \\ & \sum_{\pi' \in \Gamma(B)} \alpha_B(\pi, \pi') \sum_{\sigma \in \Gamma(A), \pi' \subset \sigma} P_A(\sigma) = X_B P_A(\pi), \end{aligned}$$

so that

$$\mathbb{E} \left[ \widehat{X}_{B, \widehat{\theta}}(\pi) \right] = \mathbb{E} \left[ \sum_{A \in \widehat{\mathcal{A}}_N \cap \mathcal{Q}(B)} \widehat{\theta}(A) \right] X_B P_A(\pi),$$

which is the desired result.  $\square$

*Proof of Proposition 2.* Using Lemma 2, one has for  $A \in \mathcal{P}(A)$  and  $\pi \in \Gamma(A)$

$$\begin{aligned} & \mathbb{E} [M_A \widehat{q}_N(\pi)] = \mathbb{E} \left[ \sum_{B \in \mathcal{P}(A) \cup \{\emptyset\}} \phi_A \widehat{X}_{B, \widehat{\theta}}(\pi) \right] \\ &= \frac{1}{|A|!} + \sum_{B \in \mathcal{P}(A)} X_B p(\pi) \mathbb{E} \left[ \sum_{A' \in \widehat{\mathcal{A}}_N \cap \mathcal{Q}(B)} \widehat{\theta}(A') \right]. \end{aligned}$$

Thus if  $\lim_{n \rightarrow \infty} \mathbb{E} \left[ \sum_{A \in \widehat{\mathcal{A}}_N \cap \mathcal{Q}(B)} \widehat{\theta}(A) \right] = 1$ , then

$$M_A \widehat{q}_N(\pi) = \frac{1}{|A|!} + \sum_{B \in \mathcal{P}(A)} X_B p(\pi) = M_A p(\pi). \quad \square$$

The proof of Theorem 4 relies on the two following lemmas

**Lemma 3.** Let  $B \in \mathcal{P}(A)$  and  $\widehat{\theta} \in \mathcal{F}(\mathcal{B}_N^\nu, \mathbb{R}^{2^n})$ . For  $\pi \in \Gamma(B)$ ,

$$\begin{aligned} & \text{Var} \left[ \widehat{X}_{B, \widehat{\theta}}(\pi) \right] = (X_B^2 p(\pi) - X_B p(\pi)^2) \\ & \quad \times \mathbb{E} \left[ \sum_{A \in \widehat{\mathcal{A}}_N \cap \mathcal{Q}(B)} \frac{\widehat{\theta}(A)^2}{|\widehat{I}_A|} \right], \end{aligned}$$

where  $X_B^2$  is the operator on  $L(\Gamma(B))$  defined by  $X_B^2 f(\pi) := \sum_{\pi' \in \Gamma(B)} \alpha_B^2(\pi, \pi') f(\pi')$  for  $f \in L(\Gamma(B))$ .

*Proof.* For  $\pi \in \Gamma(B)$ , one has

$$\begin{aligned} & \text{Var} \left[ \widehat{X}_{B, \widehat{\theta}}(\pi) \right] = \\ & \mathbb{E} \left[ \text{Var} \left[ \sum_{A \in \widehat{\mathcal{A}}_N \cap \mathcal{Q}(B)} \widehat{\theta}(A) X_B \widehat{P}_A(\pi) \mid \mathcal{B}_N^\nu \right] \right]. \end{aligned}$$

Since  $\widehat{\theta} \in \mathcal{F}(\mathcal{B}_N^\nu, \mathbb{R}^{2^n})$  by hypothesis and the  $\widehat{P}_A$ 's are independent conditionally to  $\widehat{\mathcal{A}}_N$ ,

$$\begin{aligned} & \text{Var} \left[ \sum_{A \in \widehat{\mathcal{A}}_N \cap \mathcal{Q}(B)} \widehat{\theta}(A) X_B \widehat{P}_A(\pi) \mid \mathcal{B}_N^\nu \right] = \\ & \sum_{A \in \widehat{\mathcal{A}}_N \cap \mathcal{Q}(B)} \widehat{\theta}(A)^2 \text{Var} \left[ X_B \widehat{P}_A(\pi) \mid \mathcal{B}_N^\nu \right]. \end{aligned}$$

Now, for  $A \in \mathcal{P}([n])$ ,

$$\begin{aligned} & \text{Var} \left[ X_B \widehat{P}_A(\pi) \mid \mathcal{B}_N^\nu \right] = \mathbb{E} \left[ \left( X_B \widehat{P}_A(\pi) \right)^2 \mid \mathcal{B}_N^\nu \right] \\ & \quad - \mathbb{E} \left[ X_B \widehat{P}_A(\pi) \mid \mathcal{B}_N^\nu \right]^2, \quad (1) \end{aligned}$$

with

$$\begin{aligned} & X_B \widehat{P}_A(\pi)^2 = \\ & \sum_{\pi', \pi'' \in \Gamma(B)} \alpha_B(\pi, \pi') \alpha_B(\pi, \pi'') \sum_{\substack{\sigma', \sigma'' \in \Gamma(A) \\ \pi' \subset \sigma' \\ \pi'' \subset \sigma''}} \widehat{P}_A(\sigma') \widehat{P}_A(\sigma''). \end{aligned}$$

Now, for  $\sigma, \sigma' \in \Gamma(A)$ ,

$$\begin{aligned} & \mathbb{E} \left[ \widehat{P}_A(\sigma') \widehat{P}_A(\sigma'') \mid \mathcal{B}_N^\nu \right] \\ &= \mathbb{E} \left[ \frac{1}{|\widehat{I}_A|^2} \sum_{i \in \widehat{I}_A} \mathbb{I}\{\pi^{(i)} = \sigma'\} \sum_{i \in \widehat{I}_A} \mathbb{I}\{\pi^{(i)} = \sigma''\} \mid \mathcal{B}_N^\nu \right] \\ &= \frac{1}{|\widehat{I}_A|^2} \sum_{i, j \in \widehat{I}_A} \mathbb{P} \left[ \pi^{(i)} = \sigma', \pi^{(j)} = \sigma'' \right]. \end{aligned}$$

If  $i = j$ ,

$$\mathbb{P} \left[ \pi^{(i)} = \sigma', \pi^{(j)} = \sigma'' \right] = P_A(\sigma') \mathbb{I}\{\sigma' = \sigma''\}$$

and if  $i \neq j$ ,

$$\mathbb{P} \left[ \pi^{(i)} = \sigma', \pi^{(j)} = \sigma'' \right] = P_A(\sigma') P_A(\sigma''),$$

because the  $\pi^{(i)}$ 's are independent. Thus

$$\mathbb{E} \left[ \widehat{P}_A(\sigma') \widehat{P}_A(\sigma'') \mid \mathcal{B}_N^\nu \right] = \frac{|\widehat{I}_A| - 1}{|\widehat{I}_A|} P_A(\sigma') P_A(\sigma'') + \frac{\mathbb{I}\{\sigma' = \sigma''\}}{|\widehat{I}_A|} P_A(\sigma')$$

and so

$$\sum_{\substack{\sigma', \sigma'' \in \Gamma(A) \\ \pi' \subset \sigma' \\ \pi'' \subset \sigma''}} \mathbb{E} \left[ \widehat{P}_A(\sigma') \widehat{P}_A(\sigma'') \mid \mathcal{B}_N^\nu \right] = \frac{|\widehat{I}_A| - 1}{|\widehat{I}_A|} M_B P_A(\pi') M_B P_A(\pi'') + \frac{\mathbb{I}\{\pi' = \pi''\}}{|\widehat{I}_A|} M_B P_A(\pi'),$$

because for  $\pi', \pi'' \in \Gamma(B)$ ,  $\pi' \subset \sigma'$  and  $\pi'' \subset \sigma''$  implies  $\pi' = \pi''$  (in other words,  $\sigma'$  has a unique subword of content  $B$ ). Therefore

$$\mathbb{E} \left[ \left( X_B \widehat{P}_A(\pi) \right)^2 \mid \mathcal{B}_N^\nu \right] = \frac{|\widehat{I}_A| - 1}{|\widehat{I}_A|} X_B P_A(\pi)^2 + \frac{1}{|\widehat{I}_A|} \sum_{\pi' \in \Gamma(B)} \alpha_B(\pi, \pi')^2 M_B P_A(\pi')$$

and injecting this result into (1) gives

$$\text{Var} \left[ X_B \widehat{P}_A(\pi) \mid \mathcal{B}_N^\nu \right] = \frac{1}{|\widehat{I}_A|} \left( X_B^2 P_A(\pi) - X_B P_A(\pi)^2 \right),$$

where  $X_B^2 f := \sum_{\pi' \in \Gamma(B)} \alpha_B(\pi, \pi')^2 M_B f(\pi')$  for  $f \in \bigsqcup_{A \in \mathcal{P}(\llbracket n \rrbracket)} L(\Gamma(A))$ . Gathering all the calculations, one obtains

$$\text{Var} \left[ \widehat{X}_{B, \widehat{\theta}}(\pi) \right] = \mathbb{E} \left[ \sum_{A \in \widehat{\mathcal{A}}_N \cap \mathcal{Q}(B)} \frac{\widehat{\theta}(A)^2}{|\widehat{I}_A|} \right] \times \left( X_B^2 P_A(\pi) - X_B P_A(\pi)^2 \right).$$

□

**Lemma 4.** For all  $B \in \mathcal{P}(A)$ ,

$$\mathbb{E} \left[ \sum_{A \in \widehat{\mathcal{A}}_N \cap \mathcal{Q}(B)} \widehat{\theta}^{WLS}(A) \right] = 1 - (1 - \nu[\mathcal{Q}(B)])^N,$$

$$\mathbb{E} \left[ \sum_{A \in \widehat{\mathcal{A}}_N \cap \mathcal{Q}(B)} \frac{\widehat{\theta}^{WLS}(A)^2}{|\widehat{I}_A|} \right] = \mathbb{E} \left[ \frac{\mathbb{I}\{Z_N^B \geq 1\}}{Z_N^B} \right],$$

where for any collection  $\mathcal{S} \subset \mathcal{P}(\llbracket n \rrbracket)$ ,  $\nu[\mathcal{S}] := \sum_{A \in \mathcal{S}} \nu(A)$ , and  $Z_N^B$  is a binomial random variable of parameters  $N$  and  $\nu[\mathcal{Q}(B)]$ .

*Proof.* By definition, the coefficients of the WLS estimator are given for all  $A \in \widehat{\mathcal{A}}_N \cap \mathcal{Q}(B)$  by

$$\widehat{\theta}^{WLS}(A) := \frac{\widehat{v}_N(A)}{\sum_{A' \in \widehat{\mathcal{A}}_N \cap \mathcal{Q}(B)} \widehat{v}_N(A')}.$$

For  $B \in \mathcal{P}(A)$ ,

$$\mathbb{E} \left[ \sum_{A \in \widehat{\mathcal{A}}_N \cap \mathcal{Q}(B)} \widehat{\theta}^{WLS}(A) \right] = \mathbb{E} \left[ \sum_{A \in \widehat{\mathcal{A}}_N \cap \mathcal{Q}(B)} \widehat{\theta}^{WLS}(A) \mid B \in \mathcal{P}(\widehat{\mathcal{A}}_N) \right] \times \mathbb{P} \left[ B \in \mathcal{P}(\widehat{\mathcal{A}}_N) \right],$$

because  $\sum_{A \in \widehat{\mathcal{A}}_N \cap \mathcal{Q}(B)} \widehat{\theta}^{WLS}(A) = 0$  when  $\widehat{\mathcal{A}}_N \cap \mathcal{Q}(B) = \emptyset$ . On the one hand,

$$\mathbb{E} \left[ \sum_{A \in \widehat{\mathcal{A}}_N \cap \mathcal{Q}(B)} \widehat{\theta}^{WLS}(A) \mid B \in \mathcal{P}(\widehat{\mathcal{A}}_N) \right] = \mathbb{E} \left[ \sum_{A \in \widehat{\mathcal{A}}_N \cap \mathcal{Q}(B)} \frac{\widehat{v}_N(A)}{\sum_{A' \in \widehat{\mathcal{A}}_N \cap \mathcal{Q}(B)} \widehat{v}_N(A')} \mid B \in \mathcal{P}(\widehat{\mathcal{A}}_N) \right] = 1,$$

and on the other hand,

$$\begin{aligned} \mathbb{P} \left[ B \in \mathcal{P}(\widehat{\mathcal{A}}_N) \right] &= 1 - \mathbb{P} \left[ B \notin \mathcal{P}(\widehat{\mathcal{A}}_N) \right] \\ &= 1 - \mathbb{P} \left[ \bigcap_{i=1}^N \{B \not\subset A_i\} \right] \\ &= 1 - \mathbb{P} \left[ B \not\subset \mathbf{A} \right]^N, \end{aligned}$$

where  $\mathbf{A}$  is a random variable on  $\mathcal{P}(\llbracket n \rrbracket)$  of law  $\nu$ . Then  $\mathbb{P} \left[ B \not\subset \mathbf{A} \right] = 1 - \mathbb{P} \left[ B \subset \mathbf{A} \right] = 1 - \sum_{A \in \mathcal{Q}(B)} \nu(A)$ .

Similarly,

$$\begin{aligned} \mathbb{E} \left[ \sum_{A \in \widehat{\mathcal{A}}_N \cap \mathcal{Q}(B)} \frac{\widehat{\theta}^{WLS}(A)^2}{|\widehat{I}_A|} \right] &= \mathbb{E} \left[ \sum_{A \in \widehat{\mathcal{A}}_N \cap \mathcal{Q}(B)} \frac{\widehat{\theta}^{WLS}(A)^2}{|\widehat{I}_A|} \mathbb{I}\{B \in \mathcal{P}(\widehat{\mathcal{A}}_N)\} \right] \\ &= \mathbb{E} \left[ \sum_{A \in \widehat{\mathcal{A}}_N \cap \mathcal{Q}(B)} \frac{\widehat{v}_N(A)^2 \mathbb{I}\{B \in \mathcal{P}(\widehat{\mathcal{A}}_N)\}}{|\widehat{I}_A| \left( \sum_{A' \in \widehat{\mathcal{A}}_N \cap \mathcal{Q}(B)} \widehat{v}_N(A') \right)^2} \right] \\ &= \mathbb{E} \left[ \frac{\sum_{A \in \widehat{\mathcal{A}}_N \cap \mathcal{Q}(B)} |\widehat{I}_A|}{\left( \sum_{A' \in \widehat{\mathcal{A}}_N \cap \mathcal{Q}(B)} |\widehat{I}_{A'}| \right)^2} \mathbb{I}\{B \in \mathcal{P}(\widehat{\mathcal{A}}_N)\} \right] \\ &= \mathbb{E} \left[ \frac{1}{\sum_{A \in \widehat{\mathcal{A}}_N \cap \mathcal{Q}(B)} |\widehat{I}_A|} \mathbb{I}\{B \in \mathcal{P}(\widehat{\mathcal{A}}_N)\} \right] \end{aligned}$$

(we recall that  $\widehat{\nu}_N(A) = |\widehat{I}_A|/N$ ). Now, by definition

$$\sum_{A \in \widehat{\mathcal{A}}_N \cap \mathcal{Q}(B)} |\widehat{I}_A| = \sum_{i=1}^N \mathbb{I}\{A_i \supset B\}.$$

We denote by  $Z_B$  this random variable. The  $A_i$ 's being IID,  $Z_N^B$  is a binomial random variable of parameters  $N$  and  $\mathbb{P}[A_i \supset B] = \nu[\mathcal{Q}(B)]$ . Furthermore, the event  $\{B \in \mathcal{P}(\widehat{\mathcal{A}}_N)\}$  is equal to  $\{Z_N^B \geq 1\}$ . Thus in conclusion,

$$\mathbb{E} \left[ \sum_{A \in \widehat{\mathcal{A}}_N \cap \mathcal{Q}(B)} \frac{\widehat{\theta}^{WLS}(A)^2}{|\widehat{I}_A|} \right] = \mathbb{E} \left[ \frac{\mathbb{I}\{Z_N^B \geq 1\}}{Z_N^B} \right].$$

□

*Proof of Theorem 4.* For  $B \in \mathcal{P}(\llbracket n \rrbracket)$  and  $\widehat{X}_B \in \mathcal{F}(\mathcal{B}_N, L(\Gamma(B)))$ , one has the usual bias-variance decomposition

$$\begin{aligned} \mathbb{E} \left[ \|\widehat{X}_B - X_{BP}\|_B^2 \right] &= \sum_{\pi \in \Gamma(B)} \left( \mathbb{E} \left[ \widehat{X}_B(\pi) \right] - X_{BP}(\pi) \right)^2 \\ &\quad + \sum_{\pi \in \Gamma(B)} \text{Var} \left[ \widehat{X}_B(\pi) \right]. \end{aligned}$$

Therefore, combining Proposition 1, and Lemmas 3 and 4, one obtains

$$\begin{aligned} \mathcal{E}(\widehat{q}_N^{WLS}) &\leq \sum_{B \in \mathcal{P}(\mathcal{A})} \nu_\phi(B) \mathbb{E} \left[ \|\widehat{X}_B^{WLS} - X_{BP}\|_B^2 \right] \\ &\leq \sum_{B \in \mathcal{P}(\mathcal{A})} \nu_\phi(B) \left( \sum_{\pi \in \Gamma(B)} \left( \mathbb{E} \left[ \widehat{X}_B^{WLS}(\pi) \right] - X_{BP}(\pi) \right)^2 \right. \\ &\quad \left. + \sum_{\pi \in \Gamma(B)} \text{Var} \left[ \widehat{X}_B^{WLS}(\pi) \right] \right) \\ &\leq \sum_{B \in \mathcal{P}(\mathcal{A})} \nu_\phi(B) \left( \|X_{BP}\|_B^2 (1 - \nu[\mathcal{Q}(B)])^{2N} \right. \\ &\quad \left. + \sum_{\pi \in \Gamma(B)} (X_{BP}^2(\pi) - X_{BP}(\pi)^2) \mathbb{E} \left[ \frac{\mathbb{I}\{Z_N^B \geq 1\}}{Z_N^B} \right] \right). \end{aligned}$$

Notice that for  $z \geq 1$ ,  $z + 1 \leq 2z$ , so that

$$\frac{\mathbb{I}\{Z_N^B \geq 1\}}{Z_N^B} \leq \frac{2}{Z_N^B + 1}.$$

Now, Chao & Strawderman (1972) provides the following closed-form expression, for a binomial random variable  $Z$  of parameters  $(n, p)$ ,

$$\mathbb{E} \left[ \frac{1}{Z + 1} \right] = \frac{1 - (1 - p)^{n+1}}{p(n + 1)}.$$

Therefore,

$$\mathbb{E} \left[ \frac{\mathbb{I}\{Z_N^B \geq 1\}}{Z_N^B} \right] \leq \frac{2}{\nu[\mathcal{Q}(B)](N + 1)}.$$

Defining the constants

$$\begin{aligned} C_1 &= 2 \sum_{B \in \mathcal{P}(\mathcal{A})} \frac{\nu_\phi(B) \sum_{\pi \in \Gamma(B)} (X_{BP}^2(\pi) - X_{BP}(\pi)^2)}{\nu[\mathcal{Q}(B)]} \\ C_2 &= \sum_{B \in \mathcal{P}(\mathcal{A})} \nu_\phi(B) \|X_{BP}\|_B^2 \\ \rho &= 1 - \min_{B \in \mathcal{P}(\mathcal{A})} \nu[\mathcal{Q}(B)] \end{aligned}$$

gives the desired formula. Since  $\mathcal{Q}(B) \cap \mathcal{A} \neq \emptyset$  for  $B \in \mathcal{P}(\mathcal{A})$ , one has  $\nu[\mathcal{Q}(B)] > 0$  for all  $B \in \mathcal{P}(\mathcal{A})$  and therefore  $\rho < 1$ . This concludes the proof. □

## 4. Computation of wavelet projections

The computation of wavelet projections only involves the parameters  $\alpha_B(\pi, \pi')$  for  $B \in \mathcal{P}(\llbracket n \rrbracket)$  and  $\pi, \pi' \in \Gamma(B)$ . Their computation can be made once and for all applications. Here we show how to perform it efficiently. The first simplification comes from the following lemma, established in Cl emen on et al. (2014). For  $\pi = \pi_A \dots \pi_k \in \Gamma_n$  and  $\sigma \in \mathfrak{S}_n$ , we denote by  $\sigma(\pi)$  the word  $\sigma(\pi_1) \dots \sigma(\pi_k) \in \Gamma(\sigma(c(\pi)))$ .

**Lemma 5.** *Let  $B \in \mathcal{P}(\llbracket n \rrbracket)$  and  $\sigma \in \mathfrak{S}_n$  a permutation that keeps the order of the items in  $B$ , i.e. such that for all  $b, b' \in B$ ,  $b < b' \Rightarrow \sigma(b) < \sigma(b')$ . Then for all  $\pi, \pi' \in \Gamma(B)$ ,*

$$\alpha_B(\pi, \pi') = \alpha_{\sigma(B)}(\sigma(\pi), \sigma(\pi')).$$

Lemma 5 implies two simplifications:

- First, for  $k \in \{2, \dots, n\}$ , the coefficients  $(\alpha_B(\pi, \pi'))_{\pi, \pi' \in \Gamma(B)}$  are obtained directly from the  $(\alpha_{\{1, \dots, k\}}(\pi, \pi'))_{\pi, \pi' \in \Gamma(\{1, \dots, k\})}$  for all  $B \subset \llbracket n \rrbracket$  with  $|B| = k$ .
- Second, for  $B = \{b_1, \dots, b_k\} \in \mathcal{P}(\llbracket n \rrbracket)$  with  $b_1 < \dots < b_k$ , the coefficients  $(\alpha_B(\pi, \pi'))_{\pi, \pi' \in \Gamma(B)}$  are obtained directly from the  $(\alpha_{B(b_1 \dots b_k, \pi')})_{\pi' \in \Gamma(B)}$  for any  $\pi \in \Gamma(B)$ .

*Example 1.* Let  $B = \{2, 4, 5\}$  and  $\sigma \in \mathfrak{S}_n$  such that  $\sigma(2) = 1, \sigma(4) = 2$  and  $\sigma(5) = 3$ . Then for  $\pi, \pi' \in \Gamma(\{2, 4, 5\})$ ,  $\alpha_{\{2, 4, 5\}}(\pi, \pi') = \alpha_{\{1, 2, 3\}}(\sigma(\pi), \sigma(\pi'))$ .

With the precedent simplifications, one only needs to compute and store the  $k!$  coefficients  $(\alpha_{\{1, \dots, k\}}(12 \dots k, \pi))_{\pi \in \Gamma(\{1, \dots, k\})}$  for each  $k \in \{2, \dots, K\}$ . We now further describe how the computation of each  $\alpha_{\{1, \dots, k\}}(12 \dots k, \pi)$  can be made

efficiently. By construction

$$X_A F = F - \phi_A X_{\emptyset} F - \sum_{B \in \mathcal{P}(A) \setminus \{A\}} \phi_A X_B F$$

for any  $A \in \mathcal{P}(\llbracket n \rrbracket)$  and  $F \in L(\Gamma(A))$ . Applying Lemma 1 gives the following recursive formula for the  $\alpha_B(\pi, \pi')$ 's.

**Lemma 6.** *Let  $B \in \mathcal{P}(\llbracket n \rrbracket)$  and  $k = |B|$ . Then for all  $\pi, \pi' \in \Gamma(B)$ ,*

$$\alpha_B(\pi, \pi') = \mathbb{I}\{\pi = \pi'\} - \frac{1}{k!} - \sum_{\substack{1 \leq i < j \leq k \\ j-i < k-1}} \frac{1}{(k-j+i)!} \alpha_{c(\pi_{\llbracket i, j \rrbracket})}(\pi_{\llbracket i, j \rrbracket}, \pi'_{\llbracket i, j \rrbracket}).$$

Using lemma 6, it is easy to see that the computation of all the  $\alpha_{\{1, \dots, k\}}(12 \dots k, \pi)$  for  $\pi \in \Gamma(\{1, \dots, k\})$  and  $k \in \{2, \dots, K\}$  can be implemented with complexity bounded by  $k^2$ . Combined with all the precedent simplifications, this shows the following result.

**Lemma 7.** *For  $K \in \{2, \dots, n\}$ , the computation of all coefficients  $\alpha_B(\pi, \pi')$  for  $\pi, \pi' \in \Gamma(B)$  and  $B \in \mathcal{P}(\llbracket n \rrbracket)$  with  $|B| \leq K$  has complexity bounded by  $K^2 K!$ .*

*Example 2.* The following tables give the values of the coefficients  $(\alpha_{\{1, \dots, k\}}(12 \dots k, \pi))_{\pi \in \Gamma(\{1, \dots, k\})}$  for  $k = 2$ :

|       |                             |
|-------|-----------------------------|
| $\pi$ | $\alpha_{\{1,2\}}(12, \pi)$ |
| 12    | 1/2                         |
| 21    | -1/2                        |

and  $k = 3$ :

|       |                                |
|-------|--------------------------------|
| $\pi$ | $\alpha_{\{1,2,3\}}(123, \pi)$ |
| 123   | 1/3                            |
| 132   | -1/6                           |
| 213   | -1/6                           |
| 231   | -1/6                           |
| 312   | -1/6                           |
| 321   | 1/3                            |

## 5. Technical proofs of Section 5

*Proof of Proposition 3.* By construction, any MRA-based linear ranking model can be stored directly as the collection of estimators  $(\hat{X}_B)_{B \in \mathcal{P}(\hat{\mathcal{A}}_N)}$  and not as a function on  $\mathfrak{S}_n$ .

Denoting by  $\hat{N}$  the total number of parameters to be stored, one then has

$$\begin{aligned} \hat{N} &\leq \sum_{B \in \mathcal{P}(\hat{\mathcal{A}}_N)} |B|! \leq K! |\mathcal{P}(\hat{\mathcal{A}}_N)| \\ &\leq K! \sum_{A \in \hat{\mathcal{A}}_N} 2^{|A|} \leq K! 2^K |\hat{\mathcal{A}}_N|, \end{aligned}$$

which gives the result because  $|\hat{\mathcal{A}}_N| \leq \min(N, |\mathcal{A}|)$ . Now for any  $A \in \mathcal{P}(\llbracket n \rrbracket)$ , the marginal on  $A$  of  $\hat{q}_N$  is given by  $M_A \hat{q}_N = \sum_{B \in \mathcal{P}(A) \cup \{\emptyset\}} \phi_A \hat{X}_B$ , where we set by convention  $\hat{X}_B = 0$  for  $B \in \mathcal{P}(\llbracket n \rrbracket) \setminus \mathcal{P}(A)$ . Applying Lemma 1, one then has for any  $\pi \in \Gamma(A)$  with  $k = |A|$ ,

$$M_A \hat{q}_N(\pi) = \frac{1}{k!} + \sum_{1 \leq i < j \leq k} \frac{1}{(k-j+i)!} \hat{X}_{c(\pi_{\llbracket i, j \rrbracket})}(\pi_{\llbracket i, j \rrbracket}).$$

The computation of  $M_A \hat{q}_N(\pi)$  thus requires at most  $k(k-1)/2$  operations.  $\square$

*Proof of Proposition 4.* Using the formula of Definition 4,

$$\begin{aligned} \hat{X}_B^{WLS}(\pi) &= \sum_{A \in \hat{\mathcal{A}}_N \cap \mathcal{Q}(B)} \hat{\theta}^{WLS}(A) X_B \hat{P}_A(\pi) \\ &= \sum_{A \in \hat{\mathcal{A}}_N \cap \mathcal{Q}(B)} \frac{\hat{\nu}_N(A)}{\sum_{A' \in \hat{\mathcal{A}}_N \cap \mathcal{Q}(B)} \hat{\nu}_N(A')} \\ &\quad \sum_{\pi' \in \Gamma(B)} \alpha_B(\pi, \pi') M_B \hat{P}_A(\pi'). \end{aligned}$$

Now, for  $A \in \mathcal{P}(\llbracket n \rrbracket)$  and  $\pi' \in \Gamma(B)$ ,

$$\begin{aligned} M_B \hat{P}_A(\pi') &= \sum_{\pi \in \Gamma(A), \pi' \subset \pi} \hat{P}_A(\pi) \\ &= \sum_{\pi \in \Gamma(A), \pi' \subset \pi} \frac{1}{|\hat{I}_A|} \sum_{i \in \hat{I}_A} \mathbb{I}\{\pi^{(i)} = \pi'\} \\ &= \frac{1}{|\hat{I}_A|} |\{i \in \hat{I}_A \mid \pi' \subset \pi\}|. \end{aligned}$$

Thus, recalling that  $\hat{\nu}_N(A) = |\hat{I}_A|/N$  for  $A \in \mathcal{P}(\llbracket n \rrbracket)$ ,

$$\begin{aligned} \hat{X}_B^{WLS}(\pi) &= \frac{1}{\sum_{A' \in \hat{\mathcal{A}}_N \cap \mathcal{Q}(B)} |\hat{I}_{A'}|} \\ &\quad \times \sum_{A \in \hat{\mathcal{A}}_N \cap \mathcal{Q}(B)} |\{i \in \hat{I}_A \mid \pi' \subset \pi\}|, \end{aligned}$$

which concludes the proof.  $\square$

*Proof of Proposition 5.* The explicit formula given by Proposition 4 for the WLS estimators  $\hat{X}_B^{WLS}$  shows that their computation can be decomposed in two steps:

- Compute all the  $|\hat{I}_A|$  for  $A \in \hat{\mathcal{A}}_N$  and all the  $|\{1 \leq i \leq N \mid \pi' \subset \pi^{(i)}\}|$  for  $\pi \in \Gamma_n$  such that  $c(\pi) \in \mathcal{P}(\hat{\mathcal{A}}_N)$
- Compute all the  $\hat{X}_B^{WLS}(\pi)$  for all  $B \in \mathcal{P}(\hat{\mathcal{A}}_N)$  and  $\pi \in \Gamma(B)$  using the quantities computed in the first step and the pre-computed coefficients  $\alpha_B(\pi, \pi')$  for  $\pi, \pi' \in \Gamma(B)$  and  $B \in \mathcal{P}(\hat{\mathcal{A}}_N)$ .

The first step is a simple counting of occurrence numbers and it can be performed in one loop over the dataset  $\mathcal{D}_N$  with complexity bounded by  $N2^K$ . The second step requires for each couple  $(B, \pi) \in \mathcal{P}(\widehat{\mathcal{A}}_N) \times \Gamma(B)$  at most  $\sum_{A \in \widehat{\mathcal{A}}_N \cap \mathcal{Q}(B)} (|\widehat{I}_A| + 1)$  operations. Indeed, the number of rankings  $\pi' \in \Gamma(B)$  for which  $|\{1 \leq i \leq N \mid \pi' \subset \pi^{(i)}\}| \neq 0$  is bounded by  $\sum_{A \in \widehat{\mathcal{A}}_N \cap \mathcal{Q}(B)} |\widehat{I}_A|$ . The global complexity of the second step is therefore bounded by

$$\begin{aligned} \sum_{B \in \mathcal{P}(\widehat{\mathcal{A}}_N)} |B|! \sum_{A \in \widehat{\mathcal{A}}_N \cap \mathcal{Q}(B)} (|\widehat{I}_A| + 1) \\ \leq K! \sum_{A \in \widehat{\mathcal{A}}_N} \sum_{B \in \mathcal{P}(A)} (|\widehat{I}_A| + 1) \\ \leq K! 2^K \sum_{A \in \widehat{\mathcal{A}}_N} (|\widehat{I}_A| + 1) \\ \leq K! 2^K (N + |\mathcal{A}|), \end{aligned}$$

because  $\sum_{A \in \widehat{\mathcal{A}}_N} |\widehat{I}_A| = N$  by definition and  $|\widehat{\mathcal{A}}_N| \leq |\mathcal{A}|$ . The global complexity of the two steps is then bounded by  $2^K (K! + 1)(N + |\mathcal{A}|)$ .  $\square$

## References

- Chao, M.T. and Strawderman, W.E. Negative moments of positive random variables. *Journal of the American Statistical Society*, 67:429–431, 1972.
- Cléménçon, Stéphane, Jakubowicz, Jérémie, and Sibony, Eric. Multiresolution analysis of incomplete rankings. *ArXiv e-prints*, march 2014.
